# Supplementary material
Source: PubMed Central journal article supplement (PMC2691679)

**A**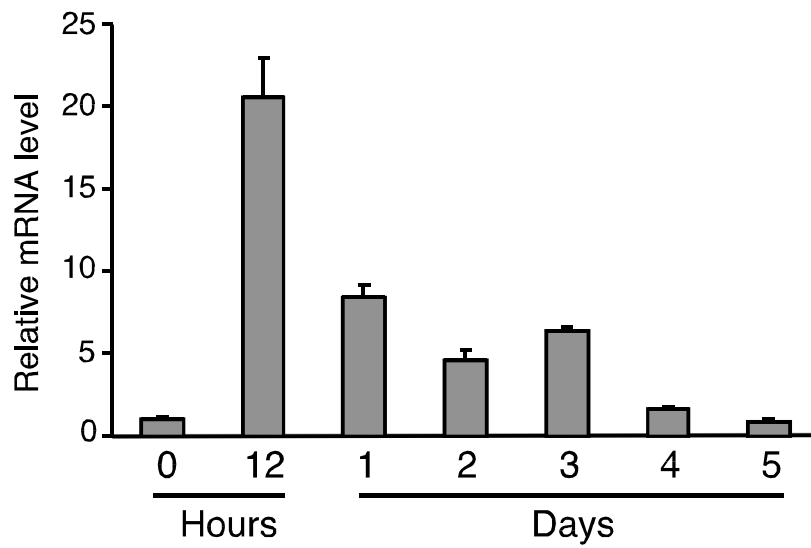**B**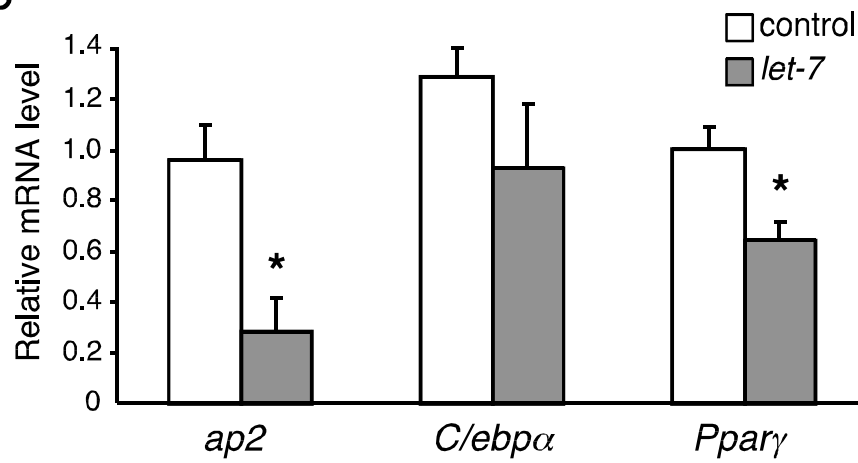

Supplementary Figure S1  
Sun et al.

Supplement: me.2008-0298_1.pdf [file me.2008-0298_1.pdf]
